# Supplementary material
Source: publisher figshare collection journal article supplement (https://acs.figshare.com/ndownloader/files/7990438)
Supplement: Supplementary file 1 [file 7990438]

---

Supporting information

**Metabolic mechanism for L-leucine-induced metabolome to eliminate**

***Streptococcus iniae***

Chao-chao Du<sup>1</sup>, Man-jun Yang<sup>1,2</sup>, Min-Yi Li<sup>1</sup>, Jun Yang<sup>1</sup>, Bo Peng<sup>1</sup>, Hui Li<sup>1</sup>,

Xuan-xian Peng<sup>1</sup>

<sup>1</sup> *Center for Proteomics and Metabolomics, State Key Laboratory of Biocontrol, School of Life Sciences, Guangdong Province Key Laboratory for Pharmaceutical Functional Genes, School of Life Sciences, Sun Yat-sen University, University City, Guangzhou 510006, People's Republic of China.*

<sup>2</sup> *Tibet Vocational Technical College, Lhasa 850000, People's Republic of China*

Table S1 The components of Jinfeng pellet – Page 2

Table S2 Tilapia liver weight in the presence or absence of exogenous L-leucine –

Page 3

Figure S1 Total liver proteins of tilapias in the presence or absence of L-leucine –

Page 4

---

**Table S1 The components of Jinfeng pellet**

| Crude protein | Crude fat | Crude fiber | Crude ash | Total phosphorus | Lysine | Sulfur amino acid | Water |
|---------------|-----------|-------------|-----------|------------------|--------|-------------------|-------|
| ≥39           | ≥3        | ≥8          | ≥12       | 0.5-2.0          | ≥1.7   | ≥0.6              | ≤12   |

---

**Table S2 Tilapia liver weight in the presence or absence of exogenous L-leucine**

| Weight of tilapia liver(g) |       |      |       |       |       |       |       |      |       |       |
|----------------------------|-------|------|-------|-------|-------|-------|-------|------|-------|-------|
| Ctr                        | 0.07  | 0.08 | 0.075 | 0.081 | 0.085 | 0.065 | 0.075 | 0.08 | 0.085 | 0.078 |
| Leu                        | 0.067 | 0.08 | 0.081 | 0.074 | 0.075 | 0.082 | 0.078 | 0.08 | 0.066 | 0.07  |

Note, there is no significant difference between control and leucine group in the tilapia liver weight( $p>0.5$ ).

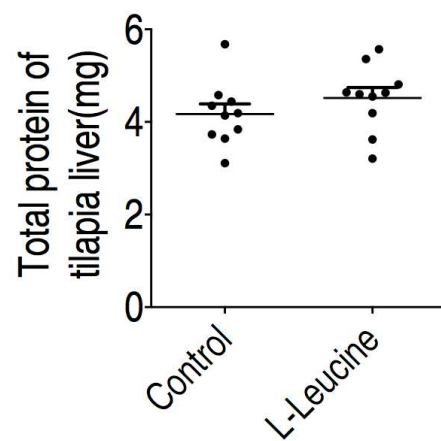

**Figure S1 Total liver proteins of tilapias in the presence or absence of L-leucine**
